# Supplementary material
Source: PubMed Central journal article supplement (PMC11383127)
Supplement: sj-pdf-1-jfm-10.1177_1098612X13502972.pdf [file sj-pdf-1-jfm-10.1177_1098612X13502972.pdf]

**Supplementary data**Scoring the cat using the CSS rubric and scoring sheet. Modified from<sup>18</sup>**Cat-Stress Score—Scoring Sheet****Date of Assessment:****Site:****Cat Name/ID #:****Intake Date:****Cage Location:****Initial Approach Test (cage closed, 60 sec):** approach (note time: \_\_\_\_\_ )      neutral      withdrawal**2<sup>nd</sup> Approach Test (cage open, head pat):** approach      neutral      withdrawal**Cat Stress Assessment**

|                     |                                      |                                                  |                               |                                    |                              |                               |                 |
|---------------------|--------------------------------------|--------------------------------------------------|-------------------------------|------------------------------------|------------------------------|-------------------------------|-----------------|
| <b>Body</b>         | on back<br>horizontal back           | on side<br>lowered hind end                      | ½ side                        | ventral<br>crouched (all fours)    | sitting                      | standing<br>shaking           | moving          |
| <b>Belly</b>        | exposed                              | not exposed                                      | slow vent.                    | normal vent.                       | fast vent.                   |                               |                 |
| <b>Legs</b>         | fully extended<br>bent               | front legs laid out<br>bent near to surface      | bent                          | hind legs laid out                 | standing, legs extended      | standing, legs                |                 |
| <b>Tail</b>         | extended<br>twitching                | loosely wrapped<br>tense downward                | up                            | loosely downward<br>curled forward | on the body<br>close to body | curved backward               |                 |
| <b>Head</b>         | laid down<br>no movement             | chin upward<br>on plane of body                  | on surface<br>lower than body | near surface                       | over body                    | moving                        | little movement |
| <b>Eyes</b>         | pressed together<br>open             | closed                                           | ½ open                        | slow blink                         | normal open                  | wide open                     | fully           |
| <b>Pupils</b>       | normal                               | partially dilated                                | dilated                       | fully dilated                      |                              |                               |                 |
| <b>Ears</b>         | ½ back<br>fully flattened            | erect to front<br>fully flattened & back on head | erect to back                 | back & forward on head             |                              | partially flattened           |                 |
| <b>Whiskers</b>     | lateral                              | forward                                          | back                          |                                    |                              |                               |                 |
| <b>Vocalization</b> | none/quiet                           | meow                                             | plaintive meow                | yowling                            | growling                     |                               |                 |
| <b>Activity</b>     | sleeping/resting<br>cramped sleeping | awake<br>trying to escape                        | alert                         | active<br>actively prowling        | playing                      | exploring<br>motionless alert |                 |

**Assigned Score:**
